# Supplementary material for: Unprecedented coexistence of cyano-bridged Mn4IIICrIIIand Mn2IIICrIIIheterobimetallic complexes in one single crystal
Source: Royal Society of Chemistry journal article supplement (doi:10.1039/b816412f), 2008-11-18
Supplement: b816412f.pdf [file b816412f.pdf]

## Supplementary information for

### Unprecedented coexistence of cyano-bridged $\text{Mn}_4^{\text{III}}\text{Cr}^{\text{III}}$ and $\text{Mn}_2^{\text{III}}\text{Cr}^{\text{III}}$ heterobimetallic complexes in one single crystal

Diana Visinescu, Luminita Marilena Toma, Francesc Lloret, Oscar Fabelo, Catalina Ruiz-Pérez and Miguel Julve

**Table S1.** Hydrogen bond distances (Å) and angles (°) in compound **1**.

| D-H...A         | O-H (Å)  | H...O (Å) | D...A (Å) | < D-H...A (°) |
|-----------------|----------|-----------|-----------|---------------|
| O1W-H11W...N11  | 0.74(5)  | 2.13(6)   | 2.827(5)  | 156(6)        |
| O1W-H12W...O1c  | 0.77(5)  | 2.08(5)   | 2.849(4)  | 172(5)        |
| O2W-H21W...O7d  | 0.68(10) | 2.34(9)   | 2.898(6)  | 140(9)        |
| O2W-H22W...O6d  | 0.92(9)  | 1.93(9)   | 2.800(5)  | 158(9)        |
| O3W-H31W...O12e | 0.71(5)  | 2.28(6)   | 2.952(5)  | 158(6)        |
| O3W-H32W...N4e  | 0.68(6)  | 2.18(6)   | 2.838(6)  | 164(6)        |

  

| D...A (Å)  |          | D...A      |          |
|------------|----------|------------|----------|
| O4W...O5W  | 2.784(2) | O4W...O5g  | 3.011(2) |
| O5W...O4Wf | 2.945(2) | O5W...N12h | 2.856(2) |

Symmetry code: (c)  $2 - x, -y, -z$ ; (d)  $2-x, 1-y, 1-z$ ; (e)  $1-x, -y, 1-z$ ; (f)  $1-x, 1-y, -z$ ;  
(g)  $-1+x, y, z$ ; (h)  $x, 1+y, z$

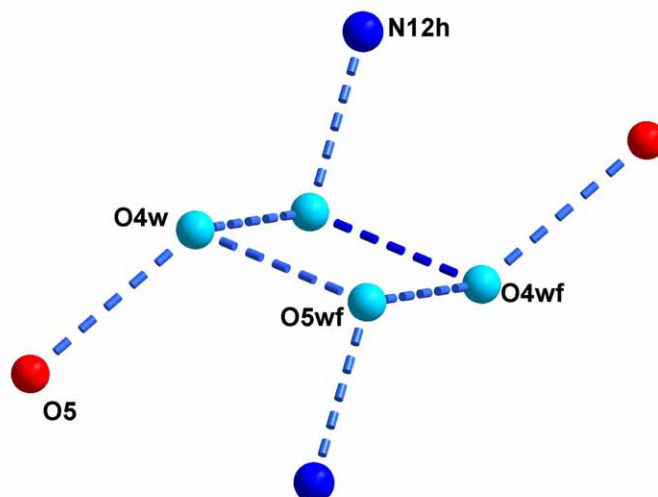

**Fig. S1.** View of the cyclic quasi-planar tetramer builded by lattice water molecules

**Table S2.** Intermetallic distances (Å)

| Pentameric unit |                       | Trimeric units |           |  |
|-----------------|-----------------------|----------------|-----------|--|
|                 | <b>Intramolecular</b> |                |           |  |
| Cr1...Mn1a      | 5.2255(5)             | Cr2...Mn3b     | 5.2121(5) |  |
| Cr1...Mn2a      | 5.2813(3)             |                |           |  |
|                 | <b>Intermolecular</b> |                |           |  |
| Mn1...Mn1c      | 5.0332(4)             | Mn3...Mn3e     | 5.2530(5) |  |
| Mn2...Mn2d      | 4.9144(3)             |                |           |  |

Symmetry code: (a) 2-x, -y, 1-z; (b) 1-x, -y, -z; (c) 2-x, -y, -z; (d) 2-x, 1-y, 1-z; (e) 1-x, -y, 1-z

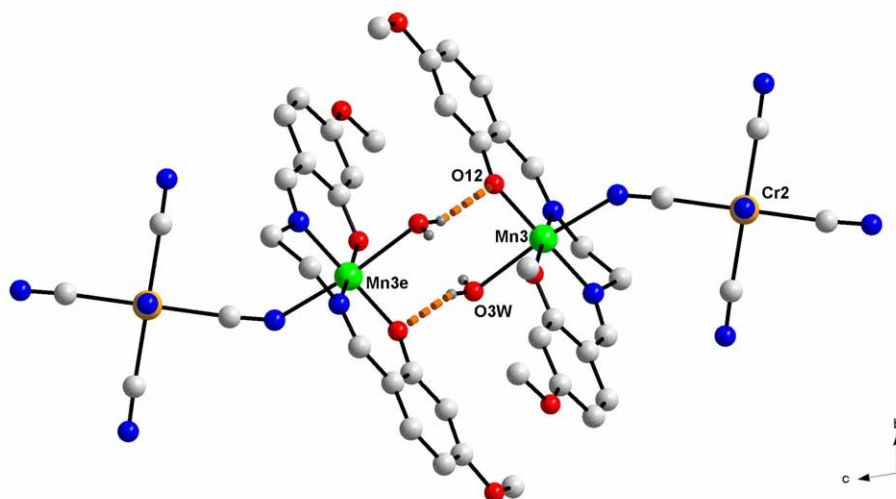

**Figure S2.** Hydrogen-bonds in the pentanuclear unit of **1**

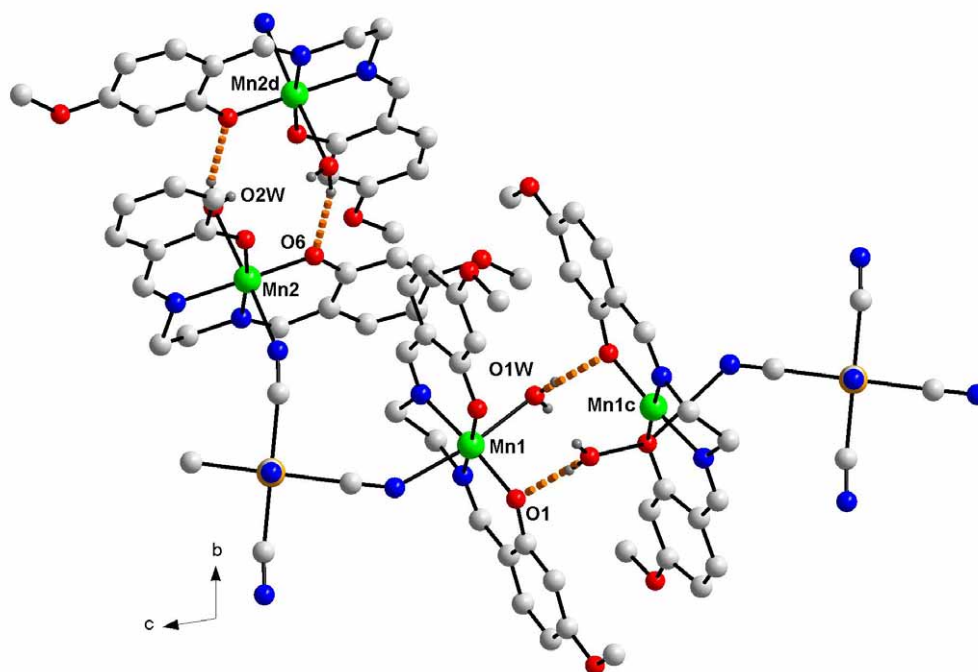

**Figure S3.** Hydrogen-bonds in the trinuclear unit of **1**

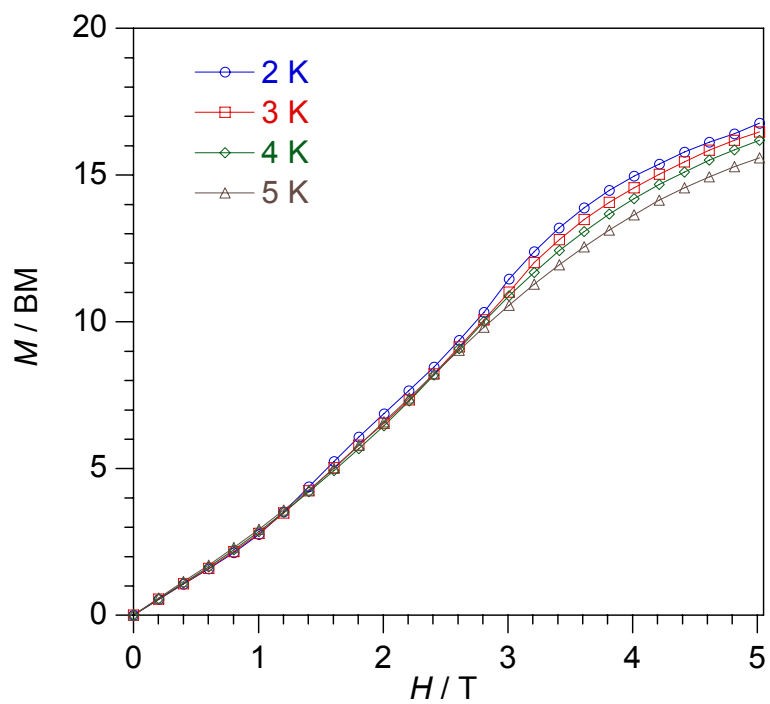

**Fig. S4.** Magnetization vs.  $H$  plot of **1** at 2.0-5.0 K.
